# Supplementary material for: Chemical profiles of birch and alder bark by ambient mass spectrometry
Source: PubMed Central journal article supplement (PMC6875546; doi:10.1007/s00216-019-02171-9), 2019-10-23
Supplement: 216_2019_2171_MOESM1_ESM.pdf [file 216_2019_2171_MOESM1_ESM.pdf]

## **Analytical and Bioanalytical Chemistry**

### **Electronic Supplementary Material**

#### **Chemical profiles of birch and alder bark by ambient mass spectrometry**

Riikka-Marjaana Räsänen, Juha-Pekka Hieta, Juha Immanen, Kaisa Nieminen, Raisa Haavikko,  
Jari Yli-Kauhaluoma, Tiina J. Kauppila

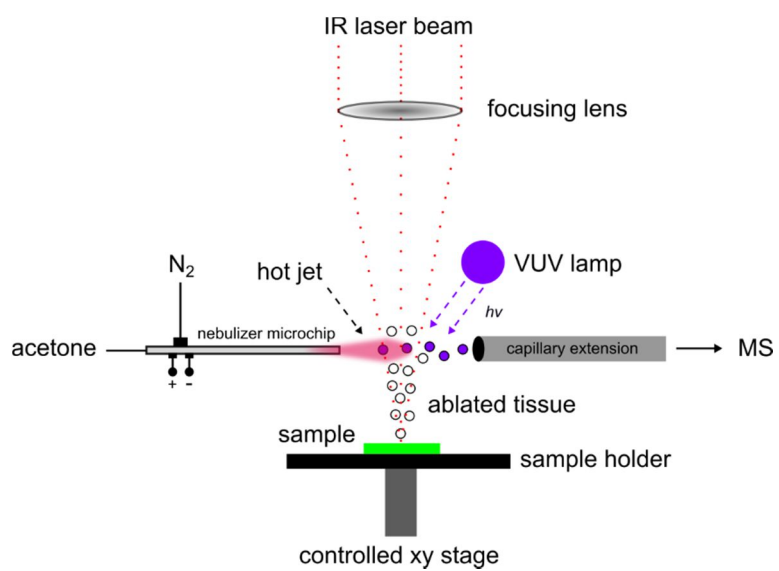

**Fig. S1** A schematic picture of the LAAPPI-MSI setup

**Table S1** Observed triterpenoid precursor ions and their MS<sup>2</sup> and MS<sup>3</sup> (marked with \*) fragments in direct infusion  $\mu$ APPI experiments, with toluene as the dopant. The main peak of the compound was chosen as the precursor ion. Nebulizer gas (N<sub>2</sub>) flow was 180 mL / min, microchip heated nebulizer heating power was 4.5 W, triterpenoid standard concentrations were 10  $\mu$ M in toluene infused with 5  $\mu$ L/min flow rate. Experiments were performed in positive ion mode. Only product ions with  $\geq 10\%$  intensities compared to the base peak intensity in the MS<sup>2</sup> spectrum, and  $\geq 20\%$  in the MS<sup>3</sup> spectrum are presented

| Triterpenoid   | Precursor ion and relative intensity (%) from the base peak | Observed MS <sup>2</sup> fragments and relative intensities (%) from the base peak                                                                                                                                                                                            |
|----------------|-------------------------------------------------------------|-------------------------------------------------------------------------------------------------------------------------------------------------------------------------------------------------------------------------------------------------------------------------------|
| Betulin        | 442 M <sup>++</sup> (7)                                     | 424 (100), 411 (93), 427 (68), 318 (41), 203 (29) 189 (29), 235 (23), 234 (20), 220 (20), 207 (19), 381 (17), 399 (13), 206 (13), 190 (11), 409 (11), 413 (11), 205 (10)                                                                                                      |
|                | 424* (13)                                                   | 189 (100), 381 (90), 409 (82), 204 (38), 202 (31), 136 (30), 190 (29), 406 (27), 393 (23), 187 (22), 216 (21)                                                                                                                                                                 |
| Lupeol         | 426 M <sup>++</sup> (5)                                     | 204 (100), 411 (98), 218 (89), 189 (66), 313 (36), 203 (35), 383 (34), 300 (34), 207 (22), 234 (21), 408 (20), 161 (16), 175 (16), 220 (15), 257 (14), 272 (14), 315 (13), 316 (13), 205 (13), 286 (12), 162 (12), 147 (12), 187 (11), 206 (11), 191 (11), 190 (10), 148 (10) |
| Betulonic acid | 456 M <sup>++</sup> (7)                                     | 438 (100), 234 (50), 248 (47), 189 (42), 316 (32), 220 (31), 410 (27), 207 (24), 395 (22), 302 (22), 441 (20), 202 (19), 187 (18), 203 (16), 191 (13), 219 (12), 423 (12), 190 (11)                                                                                           |
| Betulonic acid | 454 M <sup>++</sup> (4)                                     | 410 (100), 408 (41), 248 (34), 190 (22), 439 (17), 205 (15), 436 (14), 235 (11)                                                                                                                                                                                               |
|                | 455 [M+H] <sup>+</sup> (5)                                  | 437 (100), 409 (42), 177 (23), 411 (18), 343 (13), 391 (10), 259 (10)                                                                                                                                                                                                         |
| Allobetulin    | 442 M <sup>++</sup> (4)                                     | 424 (100), 411 (27), 220 (24), 371 (23), 149 (18), 399 (14), 205 (14), 189 (11)                                                                                                                                                                                               |
|                | 443 [M+H] <sup>+</sup> (5)                                  | 425 (100), 413 (31), 191 (30)                                                                                                                                                                                                                                                 |
| Allobetulone   | 441 [M+H] <sup>+</sup> (6)                                  | 423 (100), 411 (65), 329 (13), 177 (12), 245 (11)                                                                                                                                                                                                                             |
|                | 440 M <sup>++</sup> (8)                                     | 422 (100), 410 (93), 369 (47), 220 (41), 204 (33), 148 (17), 397 (16), 199 (15), 425 (13), 205 (12), 202 (10), 391 (10), 217 (10)                                                                                                                                             |

**Table S2** Observed betulin and allobetulin precursor ions and their MS<sup>2</sup> fragments in direct infusion  $\mu$ APPI experiments, with acetone as the dopant. Nebulizer gas (N<sub>2</sub>) flow was 180 mL / min, microchip heated nebulizer heating power was 4.5 W, triterpenoid standard concentrations were 10  $\mu$ M in acetone, infused with 5  $\mu$ L/min flow rate. Experiments were performed in positive ion mode. Only product ions with  $\geq 10\%$  intensities compared to the base peak intensity in the MS<sup>2</sup> spectrum are presented

| Triterpenoid | Precursor ion and relative intensity (%) from the base peak | Observed MS <sup>2</sup> fragments and relative intensities (%) from the base peak                                                                                                  |
|--------------|-------------------------------------------------------------|-------------------------------------------------------------------------------------------------------------------------------------------------------------------------------------|
| Betulin      | 425 (4)                                                     | 407 (100), 219 (20), 283 (18), 217 (15), 245 (15), 201 (15), 255 (14), 269 (14), 191 (14), 257 (14), 273 (12), 227 (11), 397 (11), 215 (10)                                         |
| Allobetulin  | 425 (6)                                                     | 407 (100), 247 (63), 245 (60), 191 (50), 397 (29), 229 (26), 217 (24), 301 (21), 283 (18), 203 (17), 177 (14), 227 (14), 273 (12), 257 (12), 179 (11), 275 (11), 173 (11), 395 (10) |

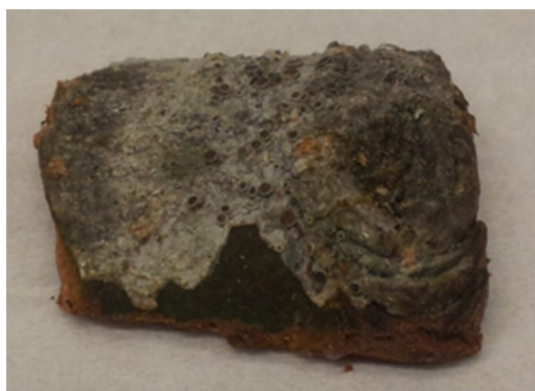

**Fig. S2** *A. incana* F1 sample (mature stem)

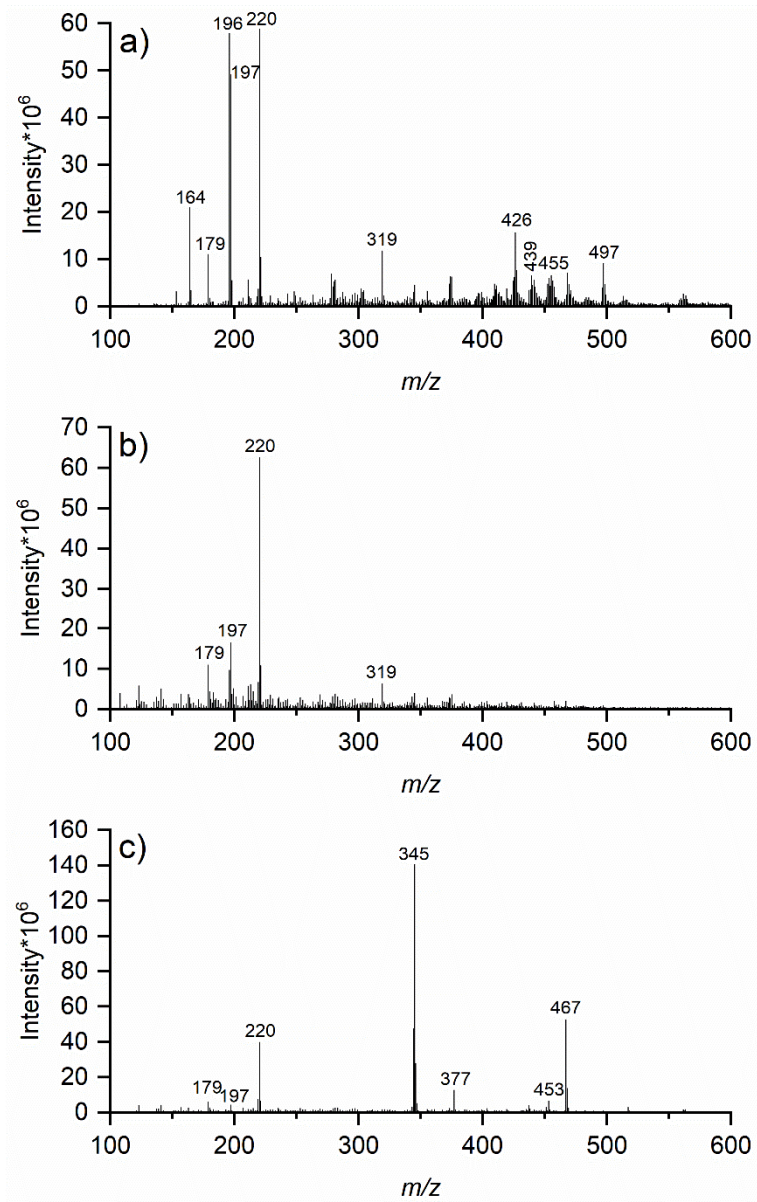

**Fig. S3** *A. incana* DAPPI mass spectra from a) lenticel, b) light grey surface, and c) dark grey surface
